# Supplementary material
Source: Springer Nature journal article supplement (https://www.springermedizin.de/resource/supplementary/12970_2007_38_MOESM1_ESM.pdf/9594272)
Supplement: MOESM1 [file 9594272]

**AB Count  
Per ML**

100000000  
90000000  
80000000  
70000000  
60000000  
50000000  
40000000  
30000000  
20000000  
10000000  
0

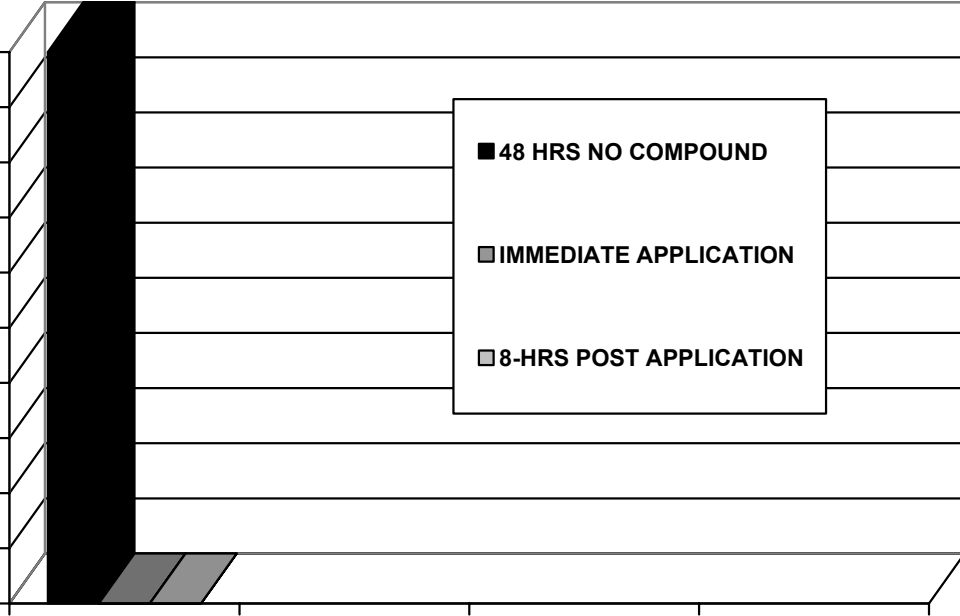

■ 48 HRS NO COMPOUND  
■ IMMEDIATE APPLICATION  
■ 8-HRS POST APPLICATION

**AB 48-HRS NO COMPOUND  
AB IMMEDIATE APPLICATION  
AB POST 8-HRS APPLICATION**
